# Supplementary material
Source: publisher figshare collection journal article supplement (https://sage.figshare.com/ndownloader/files/23742679)
Supplement: Supplementary file 1 [file 23742679]

Supplemental Table 2.

Individual Animals Histopathological Findings

| Cisplatin | | | |
| --- | --- | --- | --- |
| Animal# | Species/  gender | Dose group | Histopathological finding |
| 88 | Cyno M | 2.5 mk | Kidney: papilla hemorrhage present, papilla single cell necrosis (1), tubule degeneration (4); Inj. site: subcutis hemorrhage present, exudation (2) |
| 93 | Cyno F | 2.5 mk | Kidney: interstitium cellular infiltration (2), tubule degeneration (4); Liver: lipidosis focal (3); Inj. site: subcutis hemorrhage present |
| 100 | Cyno M | 2.5 mk | Kidney: interstitium cellular infiltration (3), tubule degeneration (4) |
| 101 | Cyno F | 2.5 mk | Kidney: interstitium cellular infiltration (1), tubule degeneration (3) |
| 102 | Cyno M | 2.5 mk | Kidney: tubule degeneration (3); Inj. site exudation (1) |
| Cefpirome | | | |
| 69 | Rhesus F | 400 mkd | Kidney: tubule basophilia (1), tubule cast (1); Muscle: degeneration, focal (1) |
| 73 | Rhesus F | 400 mkd | Muscle: degeneration focal (1) |
| 15 | Rhesus F | 800 mkd | Kidney: cellular infiltration (2), tubule basophilia (4), tubule cast (3), tubule necrosis (2) |
| 56 | Rhesus M | 800 mkd | Kidney: tubule basophilia (2), tubule cast (1), tubule necrosis (1), Muscle: degeneration focal (1) |
| 82 | Rhesus M | 800 mkd | Kidney: tubule basophilia (1) |
| Cyclosporine | | | |
| 92 | Cyno M | 20 mkd | Kidney: accumulation macrophage focal (1), cast hyaline (1), artery degeneration mural focal (2), interstitium infiltrate cortical focal mononuclear (1), tubule degeneration (1); Stomach: mucosa hemorrhage focal (1), artery degeneration mural (2); Small intestine: artery degeneration mural focal (3), artery necrosis jejunal (4); Large intestines: artery degeneration mural focal (1); Spleen + Lymph node: accumulation, macrophage (1); Thymus: depletion (3); Bone marrow: granulopoiesis increased (2); Injection site (various): hemorrhage (3), inflammation (3,4), necrosis (1,4) |
| 220 | Cyno M | 20 mkd | Kidney: accumulation macrophage focal (1); Liver: vacuolation hepatocellular (1); Spleen + lymph node: accumulation macrophage (1); Injection site (various): hemorrhage (3), inflammation (3,4), necrosis (3) |
| 232 | Cyno M | 20 mkd | Kidney: accumulation macrophage focal (1), artery degeneration mural focal (1), tubule degeneration (1); Liver: infiltrate focal (1); Spleen: accumulation macrophage (1); lymph node: accumulation macrophage (2); Injection site (various): hemorrhage (2), inflammation (2,3,4), necrosis (1,2,3) |
| Naproxen | | | |
| 41 | Cyno F | 200 mkd | Kidney: tubule degeneration epithelial (2), dilatation (3), regeneration (2), cellular cast (2), crystals (1), inflammation (2) papilla edema (1) |
| 45 | Cyno F | 200 mkd | Kidney: tubule degeneration epithelial (1), dilatation (2), regeneration (2), cellular cast (2), crystals (1), inflammation (2) papilla edema (1), papilla vacuolation (1) |
| 57 | Cyno F | 200 mkd | Kidney: tubule degeneration epithelial (2), dilatation (2), regeneration (2), cellular cast (1), crystals (0), inflammation (1) papilla edema (1) |
| 59 | Cyno F | 200 mkd | Kidney: tubule degeneration epithelial (2), dilatation (2), regeneration (2), cellular cast (1), crystals (1), inflammation (1) papilla edema (1) |
| 42 | Cyno M | 400 mkd | Kidney: tubule degeneration epithelial (2), dilatation (2), regeneration (2), cellular cast (2), crystals (1), inflammation (2) papilla edema (1), papilla vacuolation (1) |
| 61 | Cyno F | 400 mkd | Sacrificed early at SD11. Kidney: tubule degeneration epithelial (2), dilatation (3), regeneration (1), cellular cast (2), crystals (1), inflammation (1), papilla necrosis (1); Ovary: necrosis unilateral (4); Adrenal: zona fasciculata hypertrophy (1) |
| 65 | Cyno F | 400 mkd | Kidney: tubule degeneration epithelial (2), dilatation (3), regeneration (2), cellular cast (2), crystals (1), inflammation (2); Ovary: cyst present |
| 67 | Cyno F | 400 mkd | Found dead |
| Everninomicin/gentamicin | | | |
| 2001 | Cyno M | 30/10 mkd | Kidney: cast bilateral (1), tubule degeneration bilateral (3), tubule regeneration bilateral (1); Injection site: inflammation perivascular (2) |
| 2002 | Cyno M | 30/10 mkd | Kidney: cast bilateral (1), tubule degeneration bilateral (3), tubule regeneration bilateral (2), mononuclear cell infiltrate minimal; Injection site: inflammation perivascular (2) |
| 2501 | Cyno F | 30/10 mkd | Kidney: cast bilateral (2), tubule degeneration bilateral (3), tubule regeneration bilateral (1); Injection site: inflammation perivascular (3) |
| 2502 | Cyno F | 30/10 mkd | Kidney: cast bilateral (1); tubule degeneration bilateral (3); Injection site: inflammation perivascular (2) |
| 2003 | Cyno M | 30/10 mkd | Kidney: cast bilateral (1), tubule degeneration bilateral (1), tubule regeneration bilateral (3), cellular infiltration bilateral (1), mononuclear cell infiltrate minimal; Injection site: inflammation perivascular (3) |
| 2004 | Cyno M | 30/10 mkd | Kidney: cast bilateral (1), tubule regeneration bilateral (1), cellular infiltration bilateral (1); Injection site: inflammation perivascular (1); Brain: degeneration focal (1); Thymus: atrophy (1) |
| 2503 | Cyno F | 30/10 mkd | Kidney: tubule degeneration bilateral (1), tubule regeneration bilateral (2), cellular infiltration bilateral (1), mononuclear cell infiltrate minimal |
| 2504 | Cyno F | 30/10 mkd | Kidney: cast bilateral (1), tubule degeneration bilateral (1), tubule regeneration bilateral (2), cellular infiltration bilateral (1), mononuclear cell infiltrate minimal; Injection site: inflammation perivascular (3) |
| 3001 | Cyno M | 60/10 mkd | Kidney: cast bilateral (3), tubule degeneration bilateral (3), tubule regeneration bilateral (1); Liver: degeneration multifocal (1), centrilobular cell swelling; Adrenal: hemorrhage-multifocal bilateral; Injection site: inflammation perivascular (1) |
| 3002 | Cyno M | 60/10 mkd | Kidney: cast bilateral (2), tubule degeneration bilateral (2), tubule regeneration bilateral (1); Skin: ulcer focal; Stomach: erosion and ulcer; Small Intestine: duodenum erosion minimal; Injection site: inflammation perivascular (2) |
| 3501 | Cyno F | 60/10 mkd | Kidney: cast bilateral (3), tubule degeneration bilateral (3), tubule regeneration bilateral(2); Liver: necrosis-hemorrhagic (1); Adrenal: hemorrhage-multifocal bilateral; Heart: hemorrhage focal, left ventricle, minimal with degeneration; Injection site: inflammation perivascular (2) |
| 3003 | Cyno M | 60/10 mkd | Kidney: cast bilateral (1), tubule degeneration bilateral (1), tubule regeneration bilateral (1), cellular infiltration bilateral (1); Injection site: inflammation perivascular (1) |
| 3004 | Cyno M | 60/10 mkd | Kidney: tubule degeneration bilateral (1), tubule regeneration bilateral (1), cellular infiltration bilateral (1); Thymus: atrophy (2); Liver: necrosis-hemorrhagic (1), inflammation mixed focal (2) |
| 3502 | Cyno F | 60/10 mkd | Kidney: cast bilateral (1), tubule degeneration bilateral (1), tubule regeneration bilateral (2), cellular infiltration bilateral (2), mononuclear cell infiltrate mild |
| 3503 | Cyno F | 60/10 mkd | Kidney: cast bilateral (4); tubule degeneration bilateral (2), tubule regeneration bilateral (1), cellular infiltration bilateral (1); Brain: necrosis multifocal (2); Liver: Kupfer cell hypertrophy (1), large macrophages in prominent space of Disse; Injection site: inflammation perivascular (2) |

Scoring grades follow standardized PSTC Nephrotoxicity Working Group histopathological lexicon with a severity score scale of 0 to 5: 0 (no observable pathology), 1 (minimal or very slight), 2 (mild or slight), 3 (moderate), 4 (marked), or 5 (severe) 15.
